# Supplementary material
Source: publisher figshare collection journal article supplement (https://acs.figshare.com/ndownloader/files/11441864)
Supplement: Supplementary file 1 [file 11441864]

## Sheet: Sheet1
sample	treat	mouse
KO_1	KO_untr	1
KO_2	KO_untr	2
KO_3	KO_untr	3
KO_1h_LPS_1	KO_1h_LPS	1
KO_1h_LPS_2	KO_1h_LPS	2
KO_1h_LPS_3	KO_1h_LPS	3
KO_6h_LPS_1	KO_6h_LPS	1
KO_6h_LPS_2	KO_6h_LPS	2
KO_6h_LPS_3	KO_6h_LPS	3
KO_1h_TNF_1	KO_1h_TNF	1
KO_1h_TNF_2	KO_1h_TNF	2
KO_1h_TNF_3	KO_1h_TNF	3
KO_6h_TNF_1	KO_6h_TNF	1
KO_6h_TNF_2	KO_6h_TNF	2
KO_6h_TNF_3	KO_6h_TNF	3
WT_1	WT_untr	4
WT_2	WT_untr	5
WT_3	WT_untr	6
WT_1h_LPS_1	WT_1h_LPS	4
WT_1h_LPS_2	WT_1h_LPS	5
WT_1h_LPS_3	WT_1h_LPS	6
WT_6h_LPS_1	WT_6h_LPS	4
WT_6h_LPS_2	WT_6h_LPS	5
WT_6h_LPS_3	WT_6h_LPS	6
WT_1h_TNF_1	WT_1h_TNF	4
WT_1h_TNF_2	WT_1h_TNF	5
WT_1h_TNF_3	WT_1h_TNF	6
WT_6h_TNF_1	WT_6h_TNF	4
WT_6h_TNF_2	WT_6h_TNF	5
WT_6h_TNF_3	WT_6h_TNF	6
